# Supplementary material
Source: PubMed Central journal article supplement (PMC3490428)
Supplement: NIHMS270224-supplement-1.pdf [file NIHMS270224-supplement-1.pdf]

## Supplementary Information

### Strain conformation, primary structure and the propagation of the yeast prion [*PSI*<sup>+</sup>]

Katherine J. Verges\*<sup>1</sup>, Melanie H. Smith\*<sup>1,2</sup>, Brandon H. Toyama<sup>1,3</sup>, Jonathan S. Weissman<sup>1</sup>

<sup>1</sup>Department of Cellular and Molecular Pharmacology, and Howard Hughes Medical Institute, University of California, San Francisco, 94158, California, USA.

<sup>2</sup> Graduate Group in Biophysics, University of California, San Francisco, 94158, California, USA.

<sup>3</sup>Present address: The Salk Institute for Biological Studies, La Jolla, 92037, California, USA.

\*These authors contributed equally to this work.

Correspondence:

**Jonathan S. Weissman**

415-502-7642 (phone)

415-514-0273 (fax)

weissman@cmp.ucsf.edu

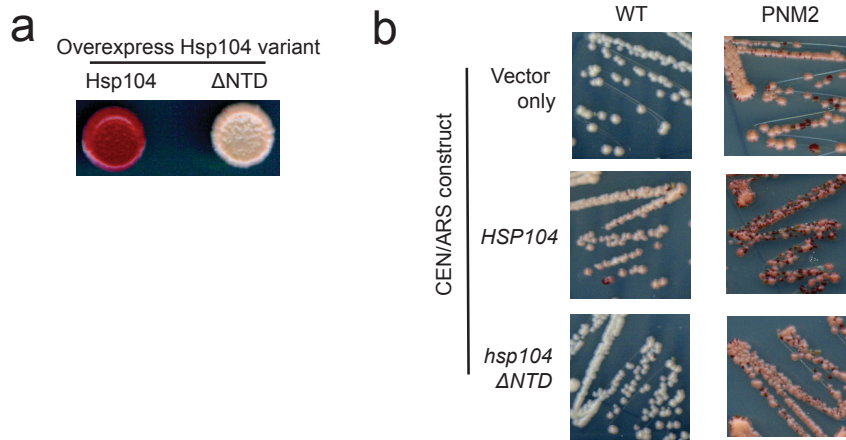

**Supplementary Figure 1.** The Hsp104 $\Delta$ NTD variant is deficient in curing but propagates  $[PSI^+]^{Sc4}$  and maintains the PNM2 phenotype. **(a)** *HSP104* or *hsp104* $\Delta$ NTD was expressed from a high copy (2 $\mu$ ) plasmid in  $[PSI^+]^{Sc4}$  yeast spotted onto low adenine media. **(b)** Streak out of yeast from Figure 5 on low adenine media for better visualization of phenotype. WT or PNM2  $[PSI^+]^{Sc4}$  yeast that express: an empty CEN/ARS plasmid (“vector only”), a CEN/ARS plasmid containing *HSP104* or a CEN/ARS plasmid containing *hsp104* $\Delta$ NTD.

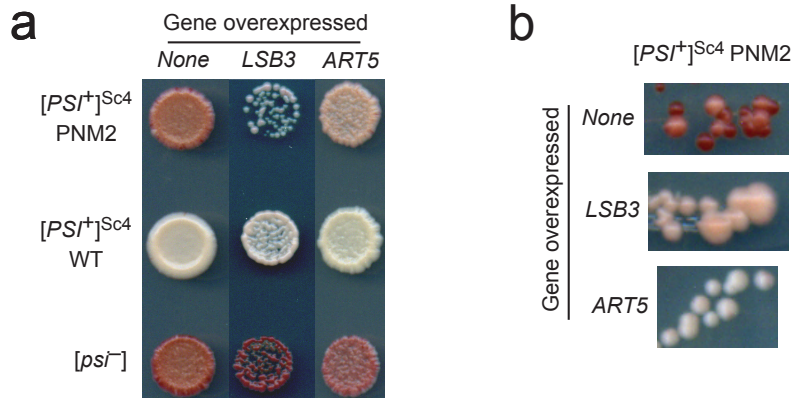

**Supplementary Figure 2.** Overexpression of either *LSB3* or *ART5* suppresses the PNM2 phenotype. **(a)** [*PSI*<sup>+</sup>]<sup>Sc4</sup> yeast with PNM2 (top row) or WT (middle row) Sup35p or WT cured to [*psi*<sup>-</sup>] (bottom row) transformed with an overexpression (2 $\mu$ ) plasmid that contains: no gene (left column), *LSB3* (middle column) or *ART5* (right column). All yeast are spotted onto low adenine media. **(b)** Single colony photographs of PNM2 [*PSI*<sup>+</sup>]<sup>Sc4</sup> yeast with an overexpression (2 $\mu$ ) plasmid that contains: no gene (top), *LSB3* (middle) or *ART5* (bottom).

Supplementary Table 1: Strains

| Sc Strain | Description                                                         | Genotype                                                                                                                                                      | Source                                        |
|-----------|---------------------------------------------------------------------|---------------------------------------------------------------------------------------------------------------------------------------------------------------|-----------------------------------------------|
| YJW1109   | 74D-694<br>[ <i>psi</i> <sup>-</sup> ]                              | 74D-694 <i>ade1-14 his3Δ200 leu2-3,112 trp1-289 ura3-52 sup35::TRP1/pRS316 [psi</i> <sup>-</sup> ]                                                            | this study                                    |
| YJW1110   | 74D-694<br>[ <i>PSI</i> <sup>+</sup> ] <sup>Sc4</sup>               | 74D-694 <i>ade1-14 his3Δ200 leu2-3,112 trp1-289 ura3-52 sup35::TRP1/pRS316 [PSI</i> <sup>+</sup> ] <sup>Sc4</sup>                                             | this study                                    |
| YJW1111   | 74D-694<br>[ <i>PSI</i> <sup>+</sup> ] <sup>Sc37</sup>              | 74D-694 <i>ade1-14 his3Δ200 leu2-3,112 trp1-289 ura3-52 sup35::TRP1/pRS316 [PSI</i> <sup>+</sup> ] <sup>Sc37</sup>                                            | this study                                    |
| YJW1112   | W303<br>[ <i>psi</i> <sup>-</sup> ] HAP                             | W303 <i>ade1-14 leu2-3,112 his3-11,15 trp1-1 can1-100 ura3::nat hsp104::TRP1/phs313HAP [psi</i> <sup>-</sup> ]                                                | this study                                    |
| YJW1113   | W303 [ <i>PSI</i> <sup>+</sup> ] <sup>Sc4</sup><br>HAP              | W303 <i>ade1-14 leu2-3,112 his3-11,15 trp1-1 can1-100 ura3::nat hsp104::TRP1/phs313HAP [PSI</i> <sup>+</sup> ] <sup>Sc4</sup>                                 | this study                                    |
| YJW1114   | W303 [ <i>PSI</i> <sup>+</sup> ] <sup>Sc4</sup><br>Hsp104           | W303 <i>ade1-14 leu2-3,112 his3-11,15 trp1-1 can1-100 ura3::nat hsp104::TRP1/phs313Hsp104 [PSI</i> <sup>+</sup> ] <sup>Sc4</sup>                              | this study                                    |
| YJW1115   | W303 [ <i>PSI</i> <sup>+</sup> ] <sup>Sc4</sup><br>HAP              | W303 <i>ade1-14 leu2-3,112 his3-11,15 trp1-1 can1-100 ura3::kan hsp104::HAP-TRP1 Sup35::nat/pRS316 WTSup35 [PSI</i> <sup>+</sup> ] <sup>Sc4</sup>             | this study                                    |
| YJW1667   | 74D-694<br>[ <i>PSI</i> <sup>+</sup> ] <sup>Sc4</sup><br>Hsp104ΔNTD | 74D-694 <i>ade1-14 his3Δ200 leu2-3,112 trp1-289 ura3-52 sup35::TRP1/pRS316 hsp104::nat-hsp104ΔNTD (resi 1-146 deleted) [PSI</i> <sup>+</sup> ] <sup>Sc4</sup> | this study;<br>Hung and Masison <sup>35</sup> |

**Supplementary Table 2: Plasmids**

| <b>Plasmid</b>                | <b>Description</b>                                                 | <b>Source</b>                              |
|-------------------------------|--------------------------------------------------------------------|--------------------------------------------|
| pRS316 WT Sup35p              | pRS316; <i>SUP35</i>                                               | this study                                 |
| pRS315 WT Sup35p              | pRS315; <i>SUP35</i>                                               | this study                                 |
| pRS315 PNM2 Sup35p            | pRS315; <i>SUP35 G58D</i>                                          | this study                                 |
| phs313 Hsp104p                | phs313; <i>HSP104</i>                                              | Tessarz et al. <sup>34</sup>               |
| phs313 HAP                    | phs313; HAP                                                        | Tessarz et al. <sup>34</sup>               |
| pmCUP425-ClpP <sup>trap</sup> | pmCUP425; ClpP <sup>trap</sup> (ClpPΔ1–13, S111A; SBP-tagged)      | Tessarz et al. <sup>34</sup>               |
| pRS313 WT Sup35p              | pRS313; <i>SUP35</i>                                               | this study                                 |
| pRS313 PNM2 Sup35p            | pRS313; <i>SUP35 G58D</i>                                          | this study                                 |
| pRS313 WT Sup35HA             | pRS313; <i>SUP35</i> with 3HA inserted after amino acid 216        | this study                                 |
| pRS313 PNM2 Sup35HA           | pRS313 <i>SUP35 G58D</i> with 3HA inserted after amino acid 216    | this study                                 |
| pRS399 WT Hsp104p             | pRS399 (pRS315 backbone with <i>Leu::KanR</i> ); <i>HSP104</i>     | this study                                 |
| pRS399 Hsp104ΔNTDp            | pRS399 (pRS315 backbone with <i>Leu::KanR</i> ); <i>hsp104ΔNTD</i> | this study; Hung and Masison <sup>35</sup> |
| pGP564                        | pGP564; empty vector                                               | Jones et al. <sup>55</sup>                 |
| pGP564 Lsb3p                  | pGP564; <i>LSB3</i>                                                | this study                                 |
| pGP564 Art5p                  | pGP564; <i>ART5</i>                                                | this study                                 |

## Supplementary Methods

**High copy PNM2 suppression screen.** Systematic overexpression of the full complement of yeast proteins was carried out using the Thermo Scientific Open Biosystems Yeast Genomic Tiling Collection<sup>55</sup>. The entire yeast genome was overexpressed in segments, each containing 4–5 genes, from 1588 clones using a pGP564 (2 $\mu$ ) vector in PNM2 [*PSI*<sup>+</sup>]<sup>Sc4</sup> yeast. Colonies were visually screened for reduced sectoring and five were identified as meeting this criteria. Individual clones were recovered from these colonies and sequenced to determine the identity of the clone. Clone YGPM21g14 was recovered 2 times and clone YGPM34g01 was recovered 3 times. Individual genes from each clone were overexpressed using the pGP546 vector to determine the causative genes. Both *LSB3* (YFR024C) and *ART5* (YGR068C) were identified as high copy suppressors of the PNM2 [*PSI*<sup>+</sup>]<sup>Sc4</sup> phenotype.

### Supplementary References

- 34 Tessarz, P., Mogk, A. & Bukau, B. Substrate threading through the central pore of the Hsp104 chaperone as a common mechanism for protein disaggregation and prion propagation. *Mol Microbiol* **68**, 87-97, (2008).
- 35 Hung, G.-C. & Masison, D.C. N-terminal domain of yeast Hsp104 chaperone is dispensable for thermotolerance and prion propagation but necessary for curing prions by Hsp104 overexpression. *Genetics* **173**, 611-620, (2006).
- 55 Jones, G. M., et al. A systematic library for comprehensive overexpression screens in *Saccharomyces cerevisiae*. *Nat Methods* **5**, 239-41 (2008).
